# Supplementary material
Source: publisher site journal article supplement (https://cdn.jamanetwork.com/ama/content_public/journal/jamanetworkopen/938633/zoi201108supp1_prod_1612371671.65601.pdf)
Supplement: Supplementary file [file zoi201108supp1_prod_1612371671.65601.pdf]

## Supplementary Online Content

Rauch JN, Valois E, Ponce-Rojas JC, et al. Comparison of severe acute respiratory syndrome coronavirus 2 screening using reverse transcriptase–quantitative polymerase chain reaction or CRISPR-based assays in asymptomatic college students. *JAMA Netw Open*. 2021;4(2):e2037129.  
doi:10.1001/jamanetworkopen.2020.37129

**eFigure 1.** Overview of CREST and RT-qPCR Protocols

**eFigure 2.** Correlation Between RT-qPCR and CREST Detection of Positive and Negative Samples

**eTable 1.** CREST Fluorescence Signal (AU) and RT-qPCR Cq Values for Each of the Positive Samples Detected in the Study

**eTable 2.** Viral Load and Known Positive and Negative Samples From the Community

**eTable 3.** SARS-CoV-2 Prevalence (Percent of Cases per Day) for Each Collection Day in Cohorts 1 and 2 in the Study

This supplementary material has been provided by the authors to give readers additional information about their work.

**eFigure 1. Overview of CREST and RT-qPCR Protocols**

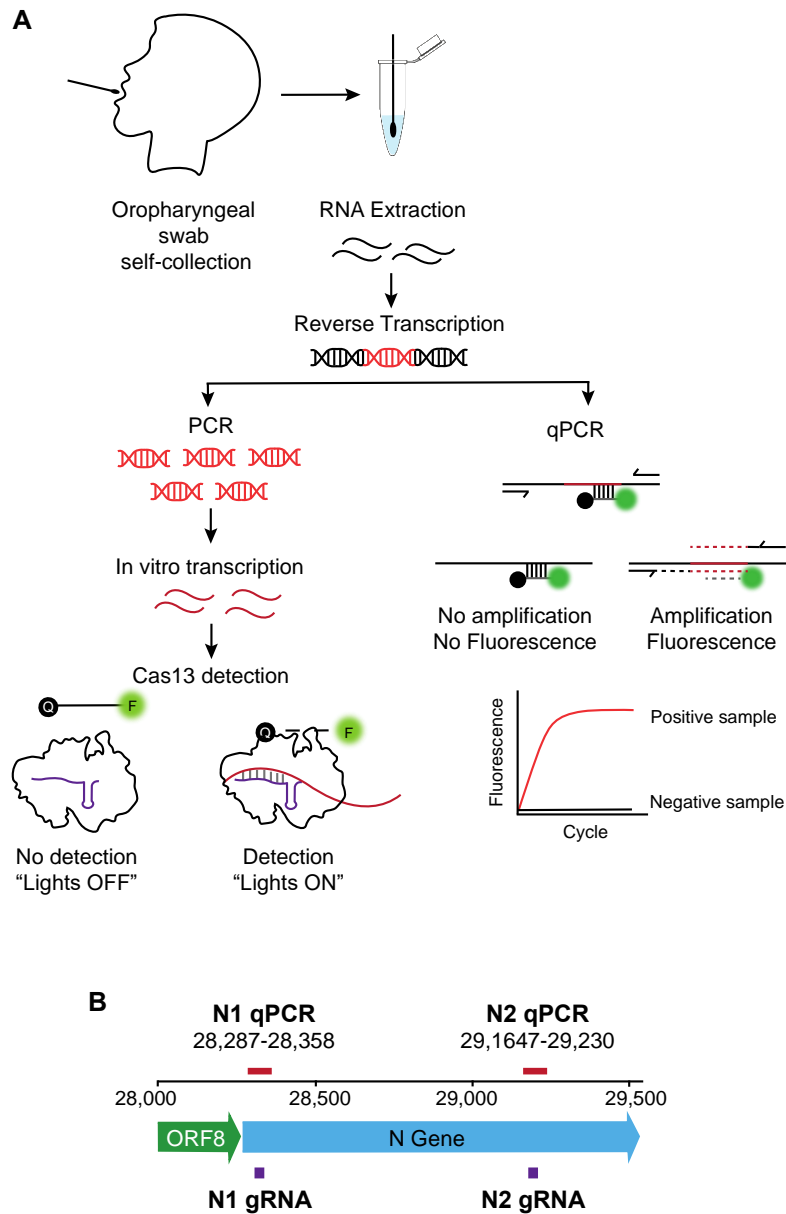

(A) Experimental strategy. Participants collected OP swabs, supervised by a healthcare provider. For CREST, the RNA was reverse transcribed, and the resulting DNA was amplified by the polymerase chain reaction (PCR) using primers for the N1, N2, and RNase P target regions (see panel B). The PCR-amplified region of interest was

subsequently transcribed *in vitro* and used as the template for detection by Cas13. The activation of Cas13 following target recognition by the guide RNA (gRNA) was measured using a fluorescent poly-U cleavage reporter. For qPCR, the RNA was reverse transcribed and detected by real-time amplification. (B) Genomic map of the SARS-CoV-2 genome regions detected in this study.

**eFigure 2. Correlation Between RT-qPCR and CREST Detection of Positive and Negative Samples**

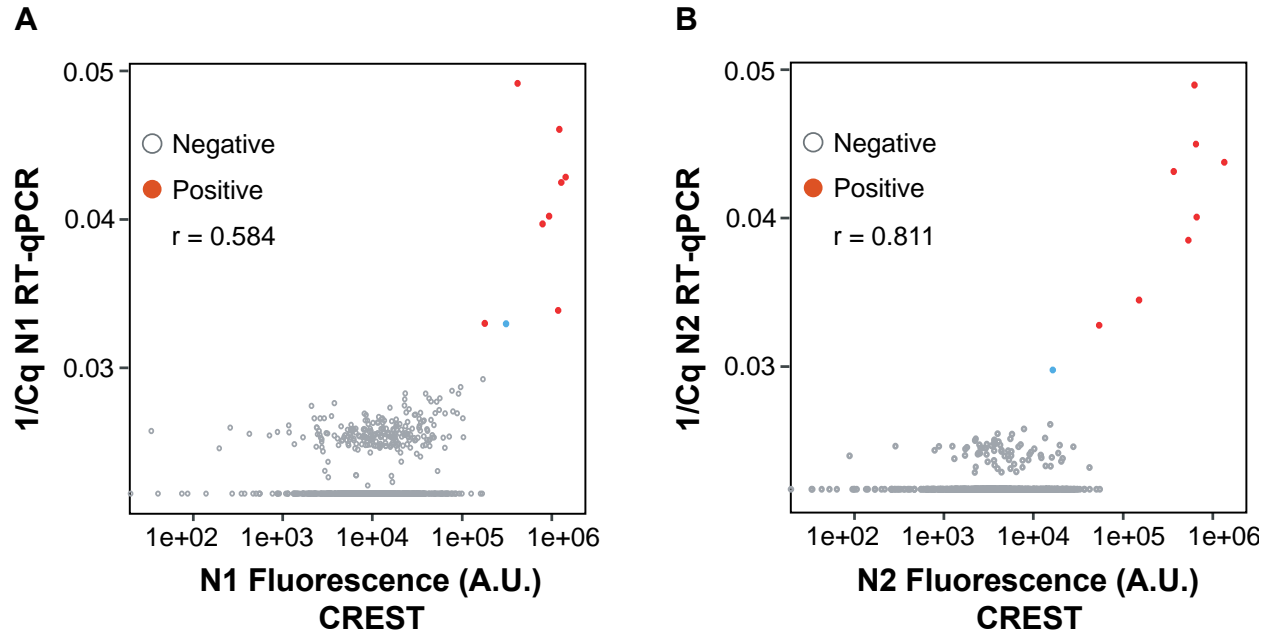

Correlation of the signal detected for N1 (A) or N2 (B) in RT-qPCR and CREST. Grey open dots indicate negative samples; solid red dots indicate positive samples. The blue dot indicates one sample detected by RT-qPCR, but not confirmed by CREST or in a CLIA laboratory test. Pearson correlation coefficient N1  $r = 0.584$ , N2  $r = 0.811$ .

**eTable 1.** CREST Fluorescence Signal (AU) and RT-qPCR Cq Values for Each of the Positive Samples Detected in the Study

| Sample     | Date of collection | CREST (Fluorescence) |         |        | RT-qPCR (Cq) |    |         |
|------------|--------------------|----------------------|---------|--------|--------------|----|---------|
|            |                    | N1                   | N2      | RNaseP | N1           | N2 | RNase P |
| 1          | 6/23/20            | 767040               | 1339679 | 678959 | 21           | 23 | 28      |
| 2          | 6/24/20            | 620196               | 150156  | 730279 | 27           | 29 | 28      |
| 3          | 6/25/20            | 676364               | 646462  | 629386 | 21           | 22 | 23      |
| *4         | 6/25/20            | 141479               | 16355   | 613756 | 28           | 34 | 26      |
| 5          | 6/25/20            | 641187               | 622513  | 458237 | 20           | 20 | 28      |
| 6          | 6/25/20            | 398685               | 659525  | 345808 | 23           | 25 | 31      |
| 7          | 6/30/20            | 196032               | 532165  | 470316 | 18           | 26 | 29      |
| 8          | 6/30/20            | 479062               | 365208  | 710805 | 23           | 23 | 27      |
| 9          | 7/2/20             | 77259                | 53825   | 450471 | 28           | 31 | 25      |
| Neg. Cont. | N/A                | 7741                 | 5980    | 5980   | 43           | 43 | 43      |
| Pos. Cont. | N/A                | 243665               | 441170  | 371064 | 11           | 11 | 18      |

The negative control is the average signal of all no template samples. The positive control is the average signal for all samples where *in vitro* transcribed RNA was used as a template. The N2 signal for sample 4 was below the limit of detection of CREST, and close to the limit of detection of RT-qPCR. This sample was not confirmed as positive by a diagnostic test performed in a CLIA-certified laboratory.

**eTable 2. Viral Load and Known Positive and Negative Samples From the Community**

| Sample       | Date of collection | Viral load              |                         |
|--------------|--------------------|-------------------------|-------------------------|
|              |                    | N1 (gen. equ./ $\mu$ L) | N2 (gen. equ./ $\mu$ L) |
| 1            | 6/23/20            | 67000                   | 42000                   |
| 2            | 6/24/20            | 871                     | 760                     |
| 3            | 6/25/20            | 58500                   | 62700                   |
| *4           | 6/25/20            | 488                     | 38                      |
| 5            | 6/25/20            | 204000                  | 204000                  |
| 6            | 6/25/20            | 18600                   | 10600                   |
| 7            | 6/30/20            | 510000                  | 5500                    |
| 8            | 6/30/20            | 23000                   | 34000                   |
| 9            | 7/2/20             | 500                     | 286                     |
| Pos. Cont. 1 | N/A                | 1006971                 | 1781555                 |
| Pos. Cont. 2 | N/A                | 139311                  | 112919                  |
| Pos. Cont. 3 | N/A                | 254744                  | 214151                  |
| Pos. Cont. 4 | N/A                | 571                     | 989                     |
| Pos. Cont. 5 | N/A                | 20866                   | 41588                   |
| Pos. Cont. 6 | N/A                | 21                      | 79                      |
| Neg. Cont. 1 | N/A                | 0.107                   | 0.001                   |
| Neg. Cont. 2 | N/A                | 0.024                   | 0.068                   |
| Neg. Cont. 3 | N/A                | 0.127                   | 0.368                   |
| Neg. Cont. 4 | N/A                | 0.001                   | 0.302                   |
| Neg. Cont. 5 | N/A                | 0.093                   | 0.084                   |
| Neg. Cont. 6 | N/A                | 0.012                   | 0.001                   |
| Neg. Cont. 7 | N/A                | 0.142                   | 0.001                   |

Viral load (genome equivalents/ $\mu$ L), calculated for the positive samples in this study, and the known positive and negative samples from the community of Santa Barbara County. Sample 4 was not confirmed by diagnostic testing in a CLIA-certified laboratory.

**eTable 3.** SARS-CoV-2 Prevalence (Percent of Cases per Day) for Each Collection Day in Cohorts 1 and 2 in the Study

| <b>Collection day</b> | <b>Total Samples</b> | <b>Positive Cases</b> | <b>% Prevalence</b> |
|-----------------------|----------------------|-----------------------|---------------------|
| 28-May                | 41                   | 0                     | 0.000               |
| 2-Jun                 | 98                   | 0                     | 0.000               |
| 3-Jun                 | 86                   | 0                     | 0.000               |
| 4-Jun                 | 108                  | 0                     | 0.000               |
| 9-Jun                 | 123                  | 0                     | 0.000               |
| 10-Jun                | 134                  | 0                     | 0.000               |
| 11-Jun                | 141                  | 0                     | 0.000               |
| 23-Jun                | 203                  | 1                     | 0.493               |
| 24-Jun                | 216                  | 1                     | 0.463               |
| 25-Jun                | 314                  | 3                     | 0.955               |
| 30-Jun                | 121                  | 2                     | 1.653               |
| 1-Jul                 | 115                  | 0                     | 0.000               |
| 2-Jul                 | 102                  | 1                     | 0.980               |
